# Supplementary material for: Bifunctional surface modification coupled with oxygen defect engineering enables high performance Li-rich cathodes
Source: Royal Society of Chemistry journal article supplement (doi:10.1039/d2ta03475a), 2022-01-01
Supplement: d2ta03475a1.pdf [file d2ta03475a1.pdf]

## Supporting Information

# Bifunctional Surface Modification Coupled with Oxygen Defect Engineering Enables High Performance Li-rich Cathode

Chaoliang Zheng<sup>a</sup>, Zhe Yang<sup>a</sup>, Jiameng Feng<sup>a</sup>, Jianjian Zhong<sup>a</sup>, Zhicheng Wei<sup>a</sup>,  
Jianling Li<sup>a\*</sup>,

<sup>a</sup> State Key Laboratory of Advanced Metallurgy, School of Metallurgical and Ecological Engineering, University of Science and Technology Beijing, Beijing 100083, China

\* Corresponding author: Jianling Li E-mail addresses: [lijianling@ustb.edu.cn](mailto:lijianling@ustb.edu.cn) (J.-L. Li)

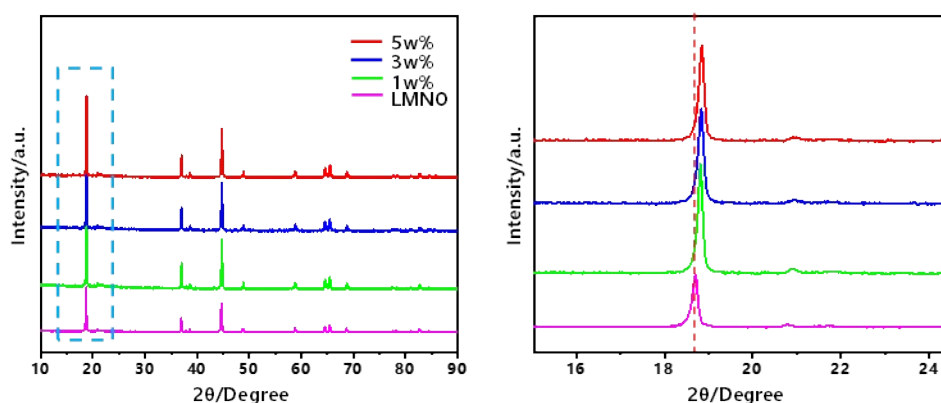

Fig. S1 XRD results of 1w%, 3w%, 5w% and LNCM samples

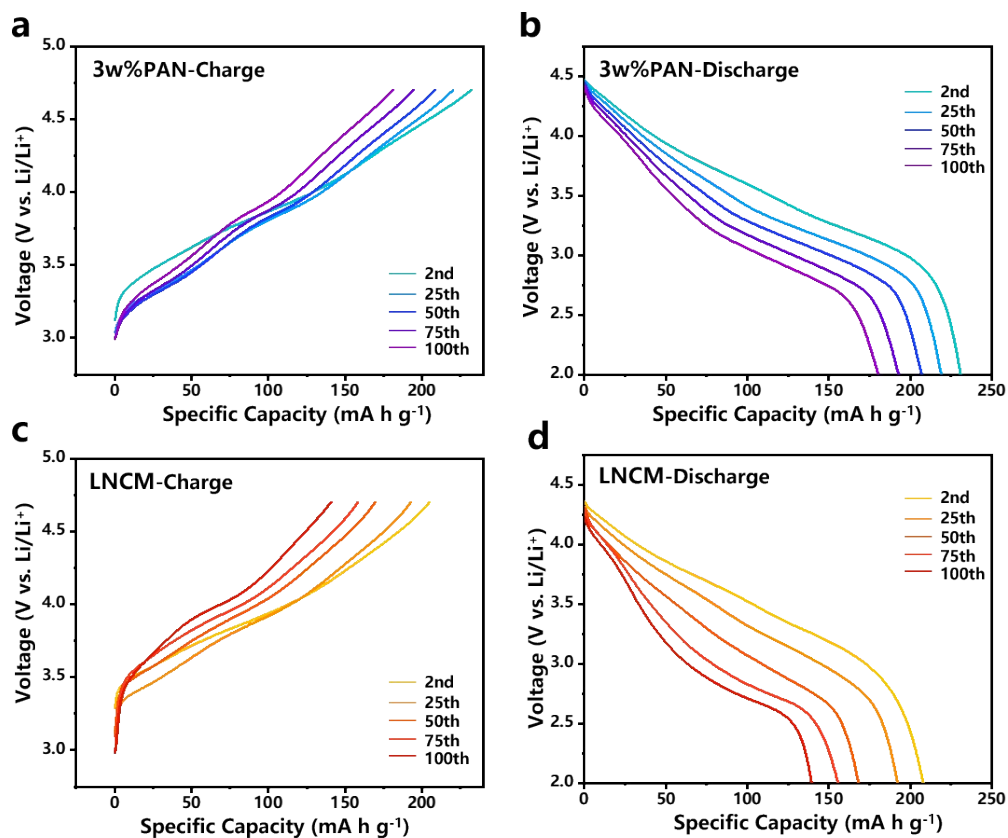

Fig. S2 Comparison of charge/discharge curves at 0.5C with different number of turns (a,b) 3w% PAN; (c-d) LNCM

Table S1 1w%, 3w%, 5w% and LNCM first cycle Coulomb efficiency

| samples                | 1w%PAN | 3w%PAN | 5w%PAN | LNCM  |
|------------------------|--------|--------|--------|-------|
| first cycle efficiency | 82.4%  | 83.1%  | 81.6%  | 80.9% |

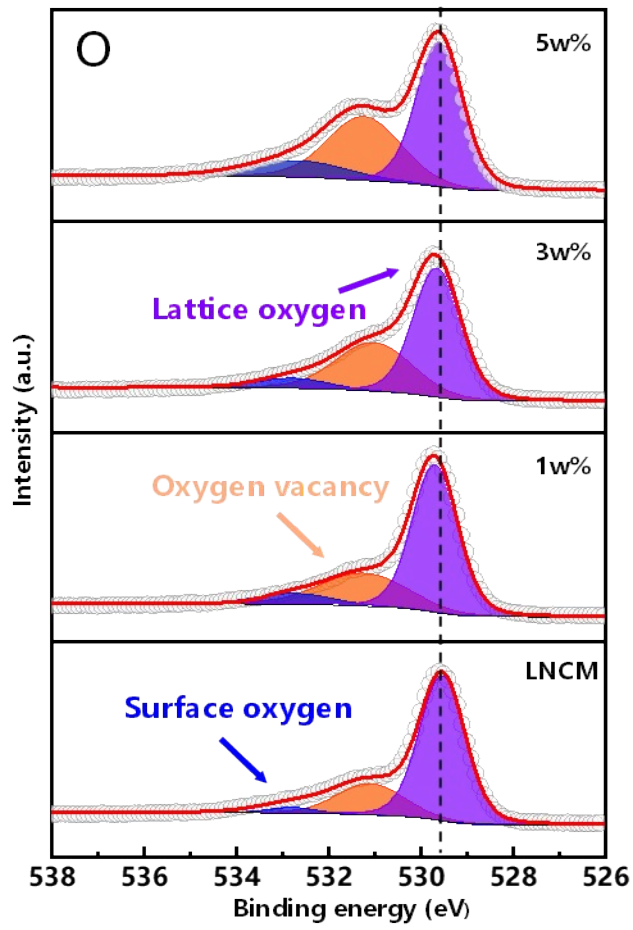

Fig. S3 XPS analysis results of oxygen element in 1w%, 3w%, 5w% and LNCM

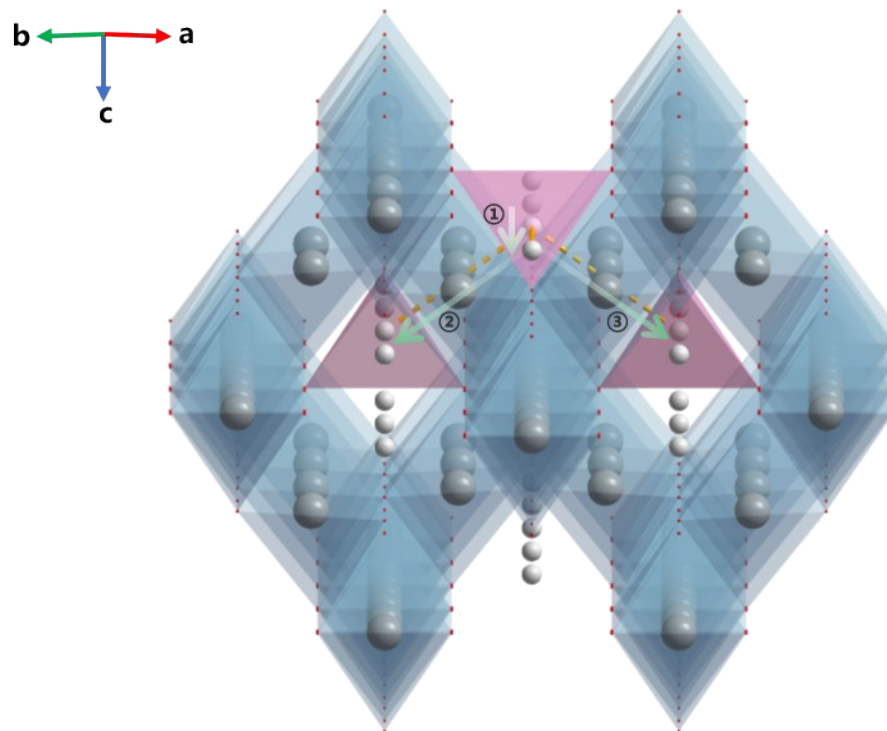

**Fig. S4 3w%-PAN sample face sweep test results**

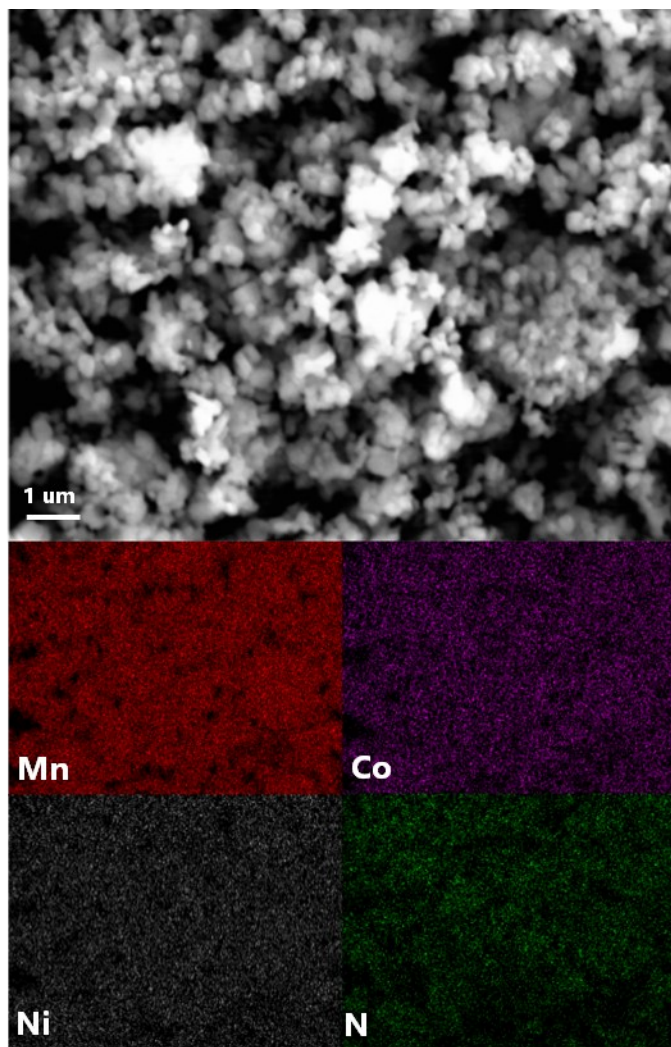

**Fig. S5 3w%-PAN sample face sweep test results**

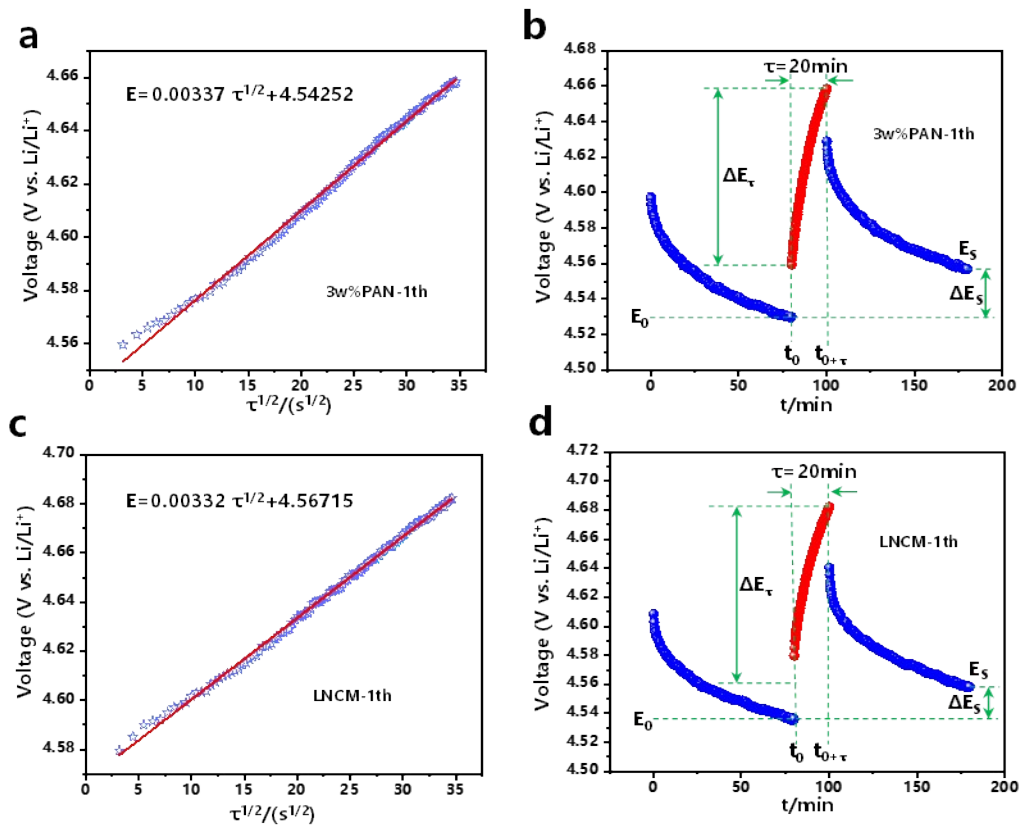

**Fig. S6 (a,c) Linear relationship between E and  $t^{1/2}$  of 3w% PAN and LNCM; (b,d) Single GITT titration curves of 3w% PAN and LNCM**

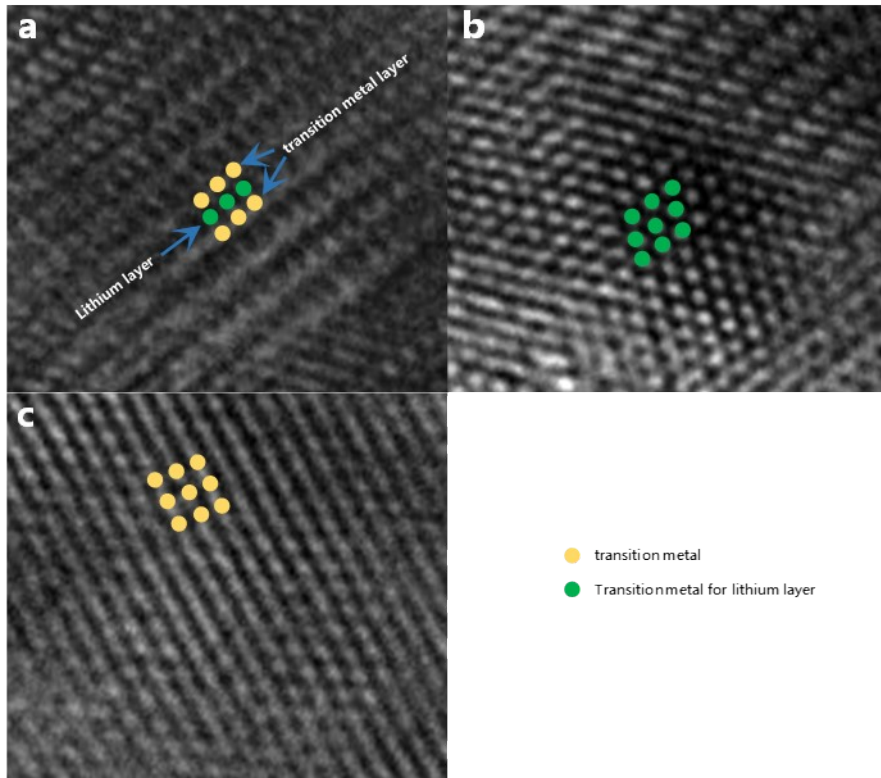

Fig. S7 Atomic arrangement (a) spinel phase; (b) salt rock phase; (c) layered structure

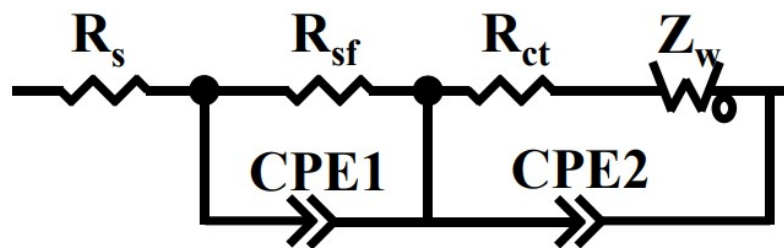

Fig. S8 AC Impedance Equivalent Circuit
